# Supplementary material for: Dietary flavonoids, luteolin and quercetin, inhibit invasion of cervical cancer by reduction of UBE2S through epithelial–mesenchymal transition signaling
Source: Royal Society of Chemistry journal article supplement (doi:10.1039/c6fo00551a), 2017-01-01
Supplement: c6fo00551a3.pdf [file c6fo00551a3.pdf]

### Supplemental Figure Legend

Figure S1. Combination treatment of luteolin and quercetin significantly reduction of UBE2S in A431-III cells. (A) Cell variability analysis of A431-III cells combined treatment with luteolin and quercetin for 24 h using an MTT assay. (B) Quantification of the transcript levels of UBE2S by a qPCR with 0.1% DMSO (Control), individual or combined with 20  $\mu$ M of luteolin and quercetin treatment for 24 h. (C) Western blot analysis of UBE2S expression levels after either 0.1% DMSO (Control), 10 and 20  $\mu$ M of luteolin, 20  $\mu$ M and 40  $\mu$ M of quercetin and combined with 20  $\mu$ M of luteolin and 20  $\mu$ M of quercetin treatment for 24 h. \*\*\* Indicates a significant difference compared to the control ( $p < 0.001$ ).
