# Supplementary figures and images for: Dietary flavonoids, luteolin and quercetin, inhibit invasion of cervical cancer by reduction of UBE2S through epithelial–mesenchymal transition signaling
Source: Royal Society of Chemistry journal article supplement (doi:10.1039/c6fo00551a), 2017-01-01

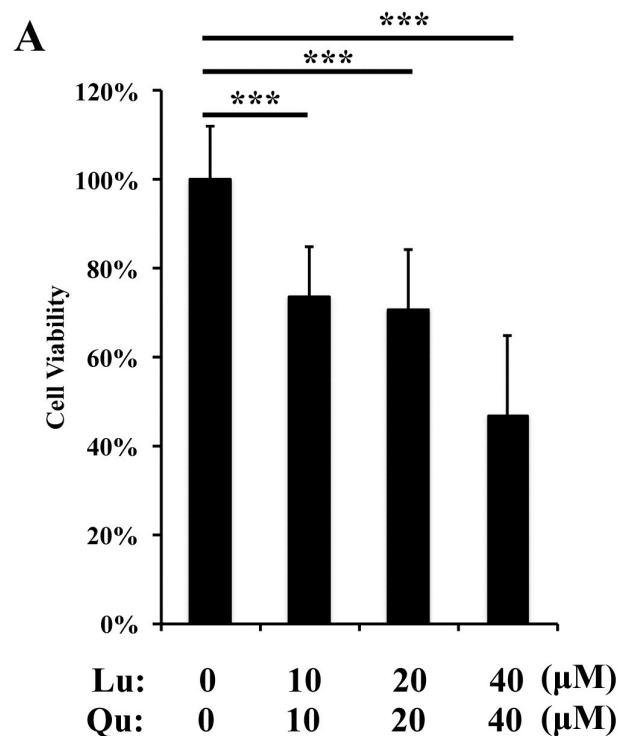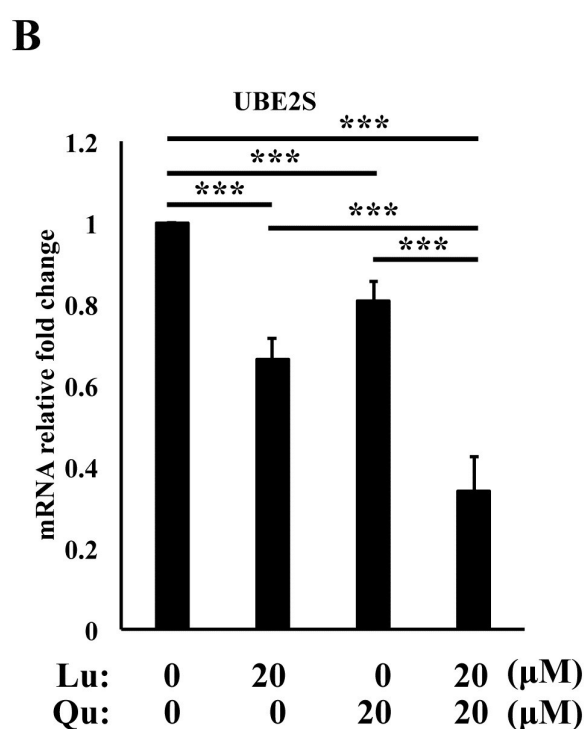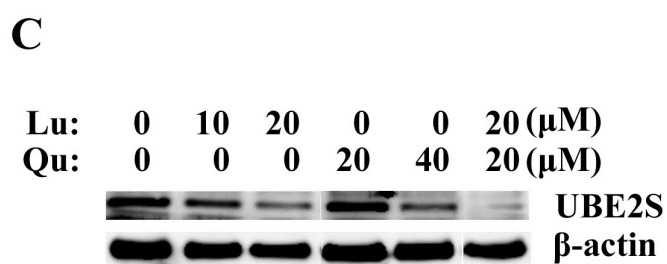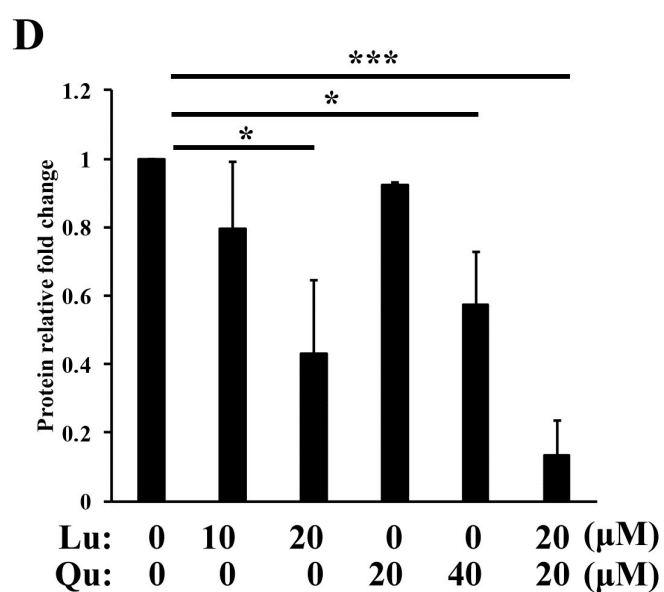

Supplement: c6fo00551a2.pdf [file c6fo00551a2.pdf]
